# Supplementary material for: PSYChosomatic Medicine in ONcologIc and Cardiac Disease (PSYCHONIC) Study—A Retrospective and Prospective Observational Research Protocol
Source: J Clin Med. 2021 Dec 10;10(24):5786. doi: 10.3390/jcm10245786 (PMC8709231; doi:10.3390/jcm10245786)
Supplement: Supplementary file 1 [file jcm-10-05786-s001.zip]

Archive with 4 entries (4 files):
- Suppl. Material 1 Enrollment body perception questionnaire.pdf
- Suppl. Material 2- One year follow-up body perception questionnaire .pdf
- Suppl. Material 3- Enrollment dream questionnaire .pdf
- Suppl. Material 4- 1-year follow-up dream questionnaire.pdf
